# Supplementary material for: Effects of plasma-generated nitrogen functionalities on the upregulation of osteogenesis of bone marrow-derived mesenchymal stem cells
Source: Royal Society of Chemistry journal article supplement (doi:10.1039/c4tb02071e), 2015-01-01
Supplement: c4tb02071e1.pdf [file c4tb02071e1.pdf]

Electronic Supplementary Information

## **Effects of Plasma-Generated Nitrogen Functionalities on Upregulation of Osteogenesis of Bone Marrow-Derived Mesenchymal Stem Cells**

**Wei Zhang,<sup>a,\*</sup> Jun Liu,<sup>a</sup> Haigang Shi,<sup>a</sup> Na Liu,<sup>b</sup> Kun Yang,<sup>a</sup> Lianxin Shi,<sup>a</sup> Bin Gu,<sup>b</sup> Huaiyu Wang,<sup>c</sup> Junhui Ji,<sup>a,\*</sup> Paul K. Chu<sup>c</sup>**

<sup>a</sup> Technical Institute of Physics and Chemistry, Chinese Academy of Sciences, Beijing 100190, China. Fax: +86-10-82543776, Tel: +86-10-82543776, Email: weizhang@mail.ipc.ac.cn and jhji@mail.ipc.ac.cn

<sup>b</sup> Stomatology Department of the General Hospital of Chinese PLA, 28 FuXing Road, Beijing 100853, China

<sup>c</sup> Department of Physics & Materials Science, City University of Hong Kong, Tat Chee Avenue, Kowloon, Hong Kong, China

### **EXPERIMENTAL DATA**

#### **1. Grazing-incidence Angle X-ray diffraction (GIAXRD) analysis**

The grazing-incidence angle X-ray diffraction (GIAXRD, D/max2550HB+/PC) (Cu K $\alpha$ , 1.5406 nm) was operated at 40 kV voltage, 200 mA and a take-off angle of 1°. The scanning rate of the X-ray detector was 1 deg/min. The X-ray beam incident direction onto the surface of the samples was perpendicular to the scanning direction of the plasma beam. Fig. S1 shows that no crystal phase occurs on PArN, PArNH, and PArNH<sub>2</sub>. It is because the pyrolytic carbon films on PE, PArN, PArNH, and PArNH<sub>2</sub> have a network structure.

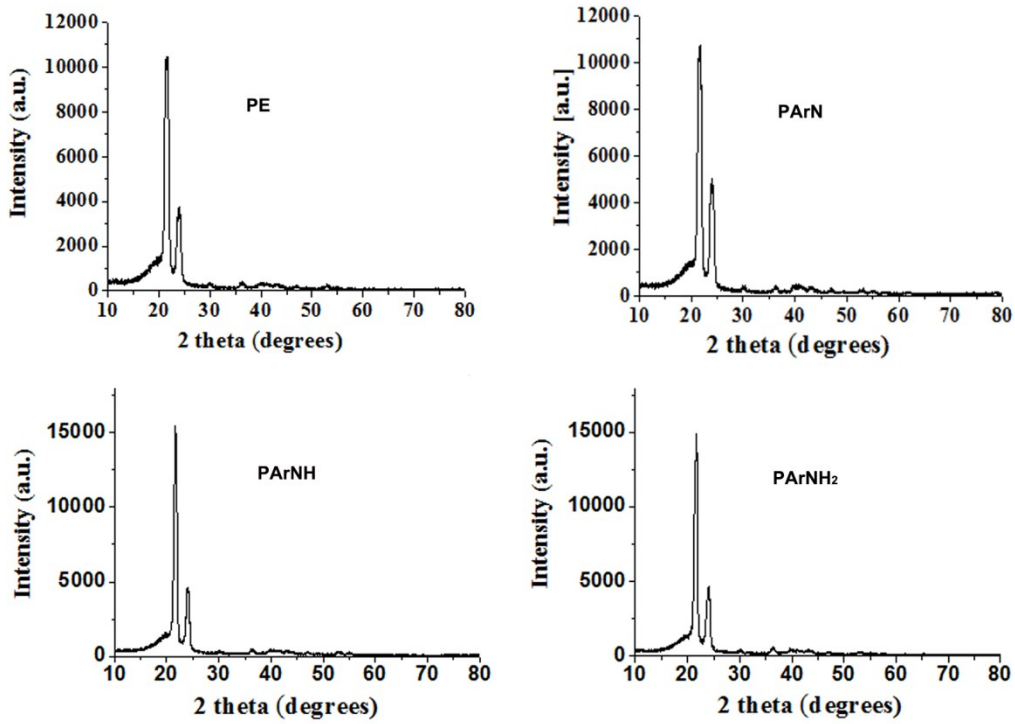

Fig. S1. GIAXRD curves of PE, PArN, PArNH, and PArNH<sub>2</sub>

## 2. Cell proliferation behaviors

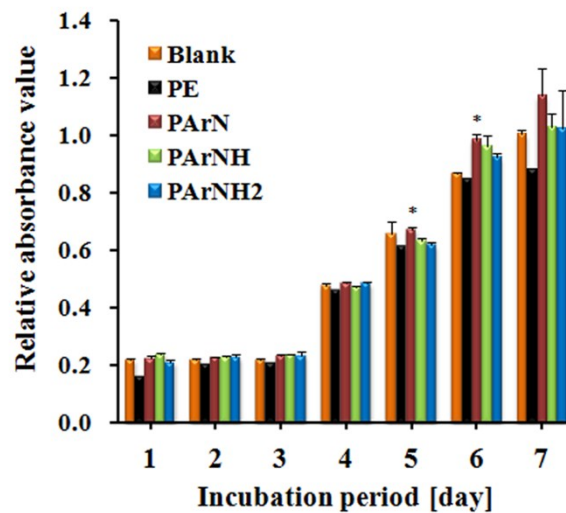

Fig. S2. Cell proliferation of BMSCs incubated on PE, PArN, PArNH, and PArNH<sub>2</sub> using MTT

assay. Asterisk (\*) denotes statistical significance compared to the PArNH<sub>2</sub> ( $p < 0.05$ )

MTT assay (sigma, USA) was performed to determine cell proliferation behaviors of

BMSCs incubated on PE, PArN, PArNH, and PArNH<sub>2</sub>. The cells ( $1 \times 10^5$  cells/disc)

were cultured with the specimens for different period, and then the specimens were rinsed twice with sterile PBS and transferred to the fresh 24-well tissue culture plates. Afterwards, MTT assay was performed according to MTT kit protocol (sigma, USA). The absorbance was measured spectrophotometrically at 490 nm. The results shown in Fig. S2 reveal that BMSCs have better cell proliferation on PArN, PArNH, and PArNH<sub>2</sub>, relative to PE. Moreover, BMSCs on PArN exhibit better growth than those on PArNH<sub>2</sub> in the later incubation period.
